# Supplementary material for: Black Bean Pasta Meals with Varying Protein Concentrations Reduce Postprandial Glycemia and Insulinemia Similarly Compared to White Bread Control in Adults
Source: MDPI journal article supplement (doi:10.3390/foods11111652), 2022-06-03
Supplement: s1 [file s1]

**Table S1. Macronutrient composition of dietary intake 24 hours prior to test days<sup>1</sup>**

| Nutrient          | White bread                         | Whole black bean <sup>a</sup>       | Knife mill <sup>b</sup>             | Combo - MP                          | Cyclone – LP                         |
|-------------------|-------------------------------------|-------------------------------------|-------------------------------------|-------------------------------------|--------------------------------------|
| Energy (kcal)     | 2084.1 ± 158.1<br>(1254.6 - 3520.6) | 1874.5 ± 150.6<br>(1042.8 - 3052.1) | 2070.0 ± 151.9<br>(1472.0 - 3905.1) | 1826.2 ± 135.4<br>(905.0 - 2796.2)  | 2012.2 ± 129.1<br>(1107.3 - 2820.0)  |
| Carbohydrate (g)  | 241.5 ± 15.5<br>(166.1 - 420.2)     | 222.3 ± 18.8<br>(113.2 - 378.5)     | 248.8 ± 18.7<br>(152.2 - 414.4)     | 215.3 ± 14.4<br>(96.1 - 320.5)      | 243.3 ± 17.2<br>(99.9 - 363.5)       |
| Available CHO (g) | 221.1 ± 15.4<br>(138.2 - 399.1)     | 202.5 ± 18.2<br>(100.4 - 353.1)     | 227.4 ± 17.9<br>(133.4 - 386.8)     | 196.7 ± 13.8<br>(85.3 - 298.5)      | 220.7 ± 16.0<br>(87.0 - 340.6)       |
| Total fiber (g)   | 20.5 ± 1.7<br>(10.0 - 35.1)         | 19.8 ± 1.7<br>(11.0 - 36.1)         | 21.4 ± 1.9<br>(10.5 - 39.8)         | 18.6 ± 1.6<br>(10.8 - 41.0)         | 22.6 ± 2.6<br>(10.0 - 57.3)          |
| Total fat (g)     | 87.5 ± 9.9<br>(39.3 - 204.8)        | 77.6 ± 8.3<br>(39.0 - 136.4)        | 78.7 ± 7.5<br>(44.6 - 153.6)        | 72.8 ± 7.3<br>(30.4 - 123.3)        | 76.5 ± 7.1<br>(29.2 - 135.0)         |
| Saturated fat (g) | 28.6 ± 2.6<br>(11.6 - 55.4)         | 24.9 ± 2.9<br>(9.8 - 45.8)          | 26.1 ± 2.8<br>(13.0 - 56.3)         | 24.5 ± 2.8<br>(7.9 - 41.7)          | 25.0 ± 2.5<br>(10.6 - 41.6)          |
| Cholesterol (mg)  | 240.2 ± 41.0<br>(46.3-639.8)        | 222.9 ± 44.9<br>(70.0 - 639.8)      | 223.2 ± 34.6<br>(99.5 - 619.5)      | 296.2 ± 53.4<br>(65.0 - 878.9)      | 253.1 ± 39.8<br>(65.0 - 639.8)       |
| Sodium (mg)       | 3907.0 ± 334.0<br>(1578.3-7800.0)   | 3877.8 ± 376.4<br>(2239.5 - 7305.8) | 3630.4 ± 312.9<br>(2078.7 - 6866.7) | 3712.7 ± 274.1<br>(1492.2 - 5440.1) | 4960.4 ± 935.6<br>(2244.5 - 19530.3) |
| Potassium (mg)    | 1619.9 ± 130.9<br>(860.0-2846.3)    | 1630.0 ± 157.5<br>(860.0 - 3102.1)  | 1792.2 ± 137.6<br>(861.7 - 2858.7)  | 1585.2 ± 107.9<br>(861.7 - 2580.3)  | 1768.5 ± 133.6<br>(898.2 - 3048.5)   |
| Protein (g)       | 87.3 ± 6.0<br>(49.0-137.8)          | 78.1 ± 6.8<br>(37.9 - 119.2)        | 90.6 ± 6.1<br>(54.2 - 157.9)        | 82.3 ± 5.7<br>(37.3-117.8)          | 89.1 ± 5.8<br>(50.3 - 134.1)         |

<sup>1</sup> All values are means ± standard error of the mean (SEM) (range) CHO = carbohydrate, kcal = kilocalorie, g = gram, mg = milligram

<sup>a</sup>n = 16, <sup>b</sup>n = 17

**Table S2. Subjective appetite individual question scores and overall appetite score for all treatments.<sup>1</sup>**

|                   | Baseline   | 30 minutes | 60 minutes | 90 minutes | 120 minutes | 150 minutes | 180 minutes |
|-------------------|------------|------------|------------|------------|-------------|-------------|-------------|
| <i>Hunger</i>     |            |            |            |            |             |             |             |
| White bread       | 65.1 ± 6.1 | 39.0 ± 5.0 | 41.2 ± 5.1 | 42.4 ± 4.7 | 50.4 ± 4.4  | 61.7 ± 5.2  | 63.9 ± 5.5  |
| Whole black beans | 68.2 ± 4.8 | 22.2 ± 4.5 | 25.1 ± 3.3 | 28.9 ± 3.8 | 31.1 ± 4.3  | 34.6 ± 4.4  | 42.8 ± 5.3  |
| Knife mill        | 62.5 ± 6.5 | 12.2 ± 3.2 | 17.0 ± 2.9 | 24.1 ± 3.8 | 28.7 ± 4.5  | 33.0 ± 4.5  | 44.3 ± 5.4  |
| Combo mill - MP   | 65.2 ± 5.3 | 12.3 ± 1.9 | 18.8 ± 2.1 | 27.9 ± 3.9 | 33.4 ± 4.0  | 40.3 ± 4.8  | 47.4 ± 5.1  |
| Cyclone mill - LP | 62.0 ± 5.2 | 14.5 ± 4.2 | 20.0 ± 3.4 | 26.5 ± 3.4 | 33.9 ± 5.0  | 40.0 ± 5.2  | 47.9 ± 6.2  |
| <i>Fullness</i>   |            |            |            |            |             |             |             |
| White bread       | 18.7 ± 4.2 | 51.4 ± 5.3 | 51.4 ± 4.9 | 48.9 ± 4.6 | 39.3 ± 4.4  | 35.9 ± 5.8  | 27.4 ± 4.3  |
| Whole black beans | 23.1 ± 4.9 | 71.1 ± 4.8 | 67.1 ± 4.8 | 63.6 ± 5.1 | 56.6 ± 5.3  | 51.4 ± 5.2  | 46.7 ± 6.0  |
| Knife mill        | 18.9 ± 5.0 | 80.9 ± 3.0 | 75.6 ± 3.5 | 68.6 ± 4.2 | 67.2 ± 4.2  | 60.0 ± 5.0  | 51.8 ± 5.4  |
| Combo mill - MP   | 21.1 ± 4.5 | 76.1 ± 3.9 | 72.7 ± 3.4 | 64.3 ± 3.9 | 58.3 ± 4.5  | 52.3 ± 4.5  | 46.1 ± 5.3  |
| Cyclone mill - LP | 22.1 ± 4.8 | 77.9 ± 3.8 | 69.9 ± 5.3 | 67.7 ± 4.1 | 58.1 ± 5.1  | 51.6 ± 5.5  | 45.3 ± 5.9  |
| <i>Satiation</i>  |            |            |            |            |             |             |             |
| White bread       | 26.3 ± 5.6 | 52.1 ± 3.9 | 49.2 ± 4.9 | 46.2 ± 4.6 | 40.7 ± 4.2  | 39.3 ± 5.8  | 33.1 ± 4.8  |
| Whole black beans | 21.2 ± 4.9 | 69.6 ± 4.1 | 65.9 ± 4.4 | 65.3 ± 3.9 | 58.5 ± 4.9  | 57.0 ± 3.8  | 54.3 ± 4.8  |
| Knife mill        | 24.0 ± 5.8 | 80.3 ± 2.5 | 72.7 ± 5.0 | 70.5 ± 3.2 | 67.4 ± 3.9  | 61.4 ± 3.7  | 54.2 ± 4.4  |

|                                |            |            |            |            |            |            |            |
|--------------------------------|------------|------------|------------|------------|------------|------------|------------|
| Combo mill - MP                | 24.0 ± 5.1 | 74.4 ± 4.2 | 70.2 ± 3.5 | 65.6 ± 3.1 | 62.3 ± 3.6 | 52.4 ± 4.5 | 52.9 ± 4.6 |
| Cyclone mill - LP              | 28.7 ± 4.7 | 78.6 ± 3.0 | 70.5 ± 3.6 | 64.9 ± 4.1 | 63.3 ± 4.4 | 55.3 ± 5.6 | 49.6 ± 6.1 |
| <i>Desire to eat</i>           |            |            |            |            |            |            |            |
| White bread                    | 66.8 ± 6.4 | 44.5 ± 5.3 | 46.1 ± 5.9 | 46.7 ± 4.8 | 56.2 ± 4.8 | 67.6 ± 5.3 | 66.9 ± 4.7 |
| Whole black beans              | 66.6 ± 4.9 | 24.8 ± 5.3 | 26.7 ± 4.2 | 35.8 ± 4.1 | 34.7 ± 5.0 | 40.2 ± 4.9 | 48.0 ± 5.4 |
| Knife mill                     | 62.6 ± 7.0 | 11.3 ± 2.6 | 20.9 ± 4.1 | 26.3 ± 4.6 | 27.1 ± 3.9 | 39.2 ± 5.0 | 47.9 ± 5.4 |
| Combo mill - MP                | 66.0 ± 5.8 | 16.0 ± 3.5 | 20.7 ± 3.5 | 29.6 ± 3.6 | 35.4 ± 4.1 | 41.8 ± 5.0 | 47.9 ± 5.1 |
| Cyclone mill - LP              | 61.6 ± 4.7 | 17.2 ± 4.7 | 20.0 ± 4.2 | 27.5 ± 4.2 | 36.0 ± 5.4 | 44.3 ± 5.4 | 51.8 ± 5.9 |
| <i>Prospective consumption</i> |            |            |            |            |            |            |            |
| White bread                    | 66.0 ± 3.8 | 44.3 ± 3.5 | 43.9 ± 4.0 | 45.9 ± 4.2 | 56.3 ± 3.1 | 65.1 ± 3.8 | 65.6 ± 3.6 |
| Whole black beans              | 69.7 ± 3.3 | 25.5 ± 4.3 | 30.9 ± 3.8 | 34.6 ± 3.7 | 38.6 ± 4.3 | 43.9 ± 3.9 | 46.3 ± 4.6 |
| Knife mill                     | 65.1 ± 4.7 | 16.3 ± 3.0 | 22.1 ± 3.5 | 31.4 ± 4.2 | 33.9 ± 4.1 | 44.4 ± 4.8 | 49.9 ± 4.6 |
| Combo mill - MP                | 66.0 ± 3.9 | 20.8 ± 3.1 | 29.4 ± 3.6 | 32.3 ± 3.4 | 38.1 ± 3.3 | 45.3 ± 4.0 | 46.3 ± 4.6 |
| Cyclone mill - LP              | 67.1 ± 3.5 | 20.4 ± 3.7 | 24.5 ± 3.3 | 33.6 ± 3.7 | 38.7 ± 4.0 | 44.1 ± 4.3 | 50.4 ± 4.5 |
| <i>Average appetite score</i>  |            |            |            |            |            |            |            |
| White bread                    | 69.8 ± 4.4 | 44.1 ± 4.1 | 44.9 ± 4.5 | 46.5 ± 4.0 | 55.9 ± 3.5 | 64.6 ± 3.8 | 67.2 ± 3.9 |
| Whole black beans              | 70.3 ± 4.1 | 25.3 ± 4.3 | 28.9 ± 3.7 | 33.9 ± 3.7 | 36.9 ± 4.3 | 41.8 ± 3.9 | 47.6 ± 4.9 |
| Knife mill                     | 67.8 ± 5.1 | 14.7 ± 2.6 | 21.1 ± 3.1 | 28.3 ± 3.7 | 30.6 ± 3.5 | 39.1 ± 4.3 | 47.6 ± 4.7 |
| Combo mill - MP                | 69.0 ± 4.4 | 18.3 ± 2.6 | 24.0 ± 2.6 | 31.4 ± 3.0 | 37.2 ± 3.4 | 43.8 ± 4.1 | 48.9 ± 4.7 |
| Cyclone mill - LP              | 67.1 ± 3.7 | 18.5 ± 3.9 | 23.6 ± 3.3 | 30.0 ± 3.2 | 37.6 ± 4.6 | 44.2 ± 4.7 | 51.2 ± 5.3 |
